# Supplementary material
Source: ML conference proceedings conference paper supplement (https://openaccess.thecvf.com/content/ACCV2022/html/Nemcovsky_Physical_Passive_Patch_ACCV_2022_paper.html)
Supplement: Supplementary file 1 [file Nemcovsky_Physical_Passive_Patch_ACCV_2022_supplemental.pdf]

## A Adversarial attacks algorithms

We present algorithms for both our PGD (Algorithm 1) and universal (Algorithm 2) attacks. In both cases we make use of the PGD adversarial attack scheme [21] to optimize a single adversarial patch. In each optimization step, we update the patch based on the gradient of the training criterion. Finally, we return the produced patch which maximized the evaluation criterion.

---

### Algorithm 1 PGD adversarial attack

---

**Input**  $VO$ : VO model  
**Input**  $A$ : Adversarial patch perturbation  
**Input**  $(x, y)$ : Trajectory to attack and it's ground truth motions  
**Input**  $(\ell_{train}, \ell_{eval})$ : Train and evaluation loss functions  
**Input**  $\alpha$ : Step size for the attack

$P \leftarrow \text{Uniform}(0, 1)$   
 $P_{\text{best}} \leftarrow P$   
 $\text{Loss}_{\text{best}} \leftarrow 0$   
**for**  $k = 1$  to  $K$  **do**  
  **optimization step:**  
   $g \leftarrow \nabla_P \ell_{train}(VO(A(x, P)), y)$   
   $P \leftarrow P + \alpha \cdot \text{sign}(g)$   
   $P \leftarrow \text{clip}(P, 0, 1)$   
  **evaluate patch:**  
   $\text{Loss} \leftarrow \ell_{eval}(VO(A(x, P)), y)$   
  **if**  $\text{Loss} > \text{Loss}_{\text{best}}$  **then**  
     $P_{\text{best}} \leftarrow P$   
     $\text{Loss}_{\text{best}} \leftarrow \text{Loss}$   
  **end if**  
**end for**  
**return**  $P_{\text{best}}$

---

## B Real data experiment specifics

For the generation of the real dataset, in addition to the Mocap markers we make use of Aruco markers to produce the patch's coordinates in the camera system for each frame, which are then used for generating the patch's mask. In addition, the Aruco Markers, being printed on paper or some other material, provide an estimate for the albedo extremes of the printed patch on the same material. In each frame, we then make use of the detected patch to estimate its albedo limits. We calculate these limits by fitting the pixel histogram of the patch area to a Bivariate normal distribution. We account for the illumination variation within this area by multiplying our albedo images by the lightness channel of the HSL (hue, saturation, lightness) representation of the original image. As seen

---

**Algorithm 2** Universal PGD adversarial attack

---

**Input**  $VO$ : VO model  
**Input**  $A$ : Adversarial patch perturbation  
**Input**  $(X_{train}, Y_{train})$ : Trajectories training dataset  
**Input**  $(X_{eval}, Y_{eval})$ : Trajectories evaluation dataset  
**Input**  $(\ell_{train}, \ell_{eval})$ : Training and evaluation loss functions  
**Input**  $(N_{train}, N_{eval})$ : Number of training and evaluation trajectories  
**Input**  $\alpha$ : Step size for the attack

$P \leftarrow \text{Uniform}(0, 1)$   
 $P_{\text{best}} \leftarrow P$   
 $\text{Loss}_{\text{best}} \leftarrow 0$   
**for**  $k = 1$  to  $K$  **do**  
   optimization step:  
    $g \leftarrow 0$   
   **for**  $i = 1$  to  $N_{train}$  **do**  
       $\hat{y}_{train,i} \leftarrow VO(A(x_{train,i}, P))$   
       $g \leftarrow g + \nabla_P \ell_{train}(\hat{y}_{train,i}, y_{train,i})$   
   **end for**  
    $P \leftarrow P + \alpha \cdot \text{sign}(g)$   
    $P \leftarrow \text{clip}(P, 0, 1)$   
   evaluate patch:  
    $\text{Loss} \leftarrow 0$   
   **for**  $i = 1$  to  $N_{eval}$  **do**  
       $\hat{y}_{eval,i} \leftarrow VO(A(x_{eval,i}, P))$   
       $\text{Loss} \leftarrow \text{Loss} + \ell_{eval}(\hat{y}_{eval,i}, y_{eval,i})$   
   **end for**  
   **if**  $\text{Loss} > \text{Loss}_{\text{best}}$  **then**  
       $P_{\text{best}} \leftarrow P$   
       $\text{Loss}_{\text{best}} \leftarrow \text{Loss}$   
   **end if**  
**end for**  
**return**  $P_{\text{best}}$

---

in Fig. 3, the black and white albedo images accordingly resemble the black and white pixels in the Aruco markers.

Throughout the data-set generation process, we discarded trajectories with incomplete camera pose or patch coordinates.

The trajectories initial positions formed an horizontal angle range of  $[-8.5^\circ, 8.5^\circ]$  with respect to the target patch plane.
